# Supplementary material for: Correlating Magnetic Hyperthermia and Magnetic Resonance Imaging Contrast Performance of Cubic Iron Oxide Nanoparticles with Crystal Structural Integrity
Source: PubMed Central journal article supplement (PMC9798828; doi:10.1021/acs.chemmater.2c00708), 2022-08-11
Supplement: cm2c00708_si_001.pdf [file cm2c00708_si_001.pdf]

# Correlating magnetic hyperthermia and magnetic resonance imaging contrast performance of cubic iron oxide nanoparticles with crystal structural integrity

*Sameer D. Shingte <sup>a</sup>, Abhijit H. Phakatkar <sup>b</sup>, Eoin McKiernan <sup>a</sup>, Karina Nigoghossian <sup>a</sup>, Steven Ferguson <sup>c</sup>, Reza Shahbazian-Yassar <sup>d</sup>, Dermot F. Brougham <sup>a,\*</sup>*

<sup>a</sup> School of Chemistry, University College Dublin, Dublin, Ireland

<sup>b</sup> Department of Biomedical Engineering, University of Illinois at Chicago, Illinois, USA

<sup>c</sup> School of Chemical and Bioprocess Engineering, University College Dublin, Dublin, Ireland

<sup>d</sup> Department of Mechanical and Industrial Engineering, University of Illinois at Chicago, Illinois, USA

## SUPPORTING INFORMATION

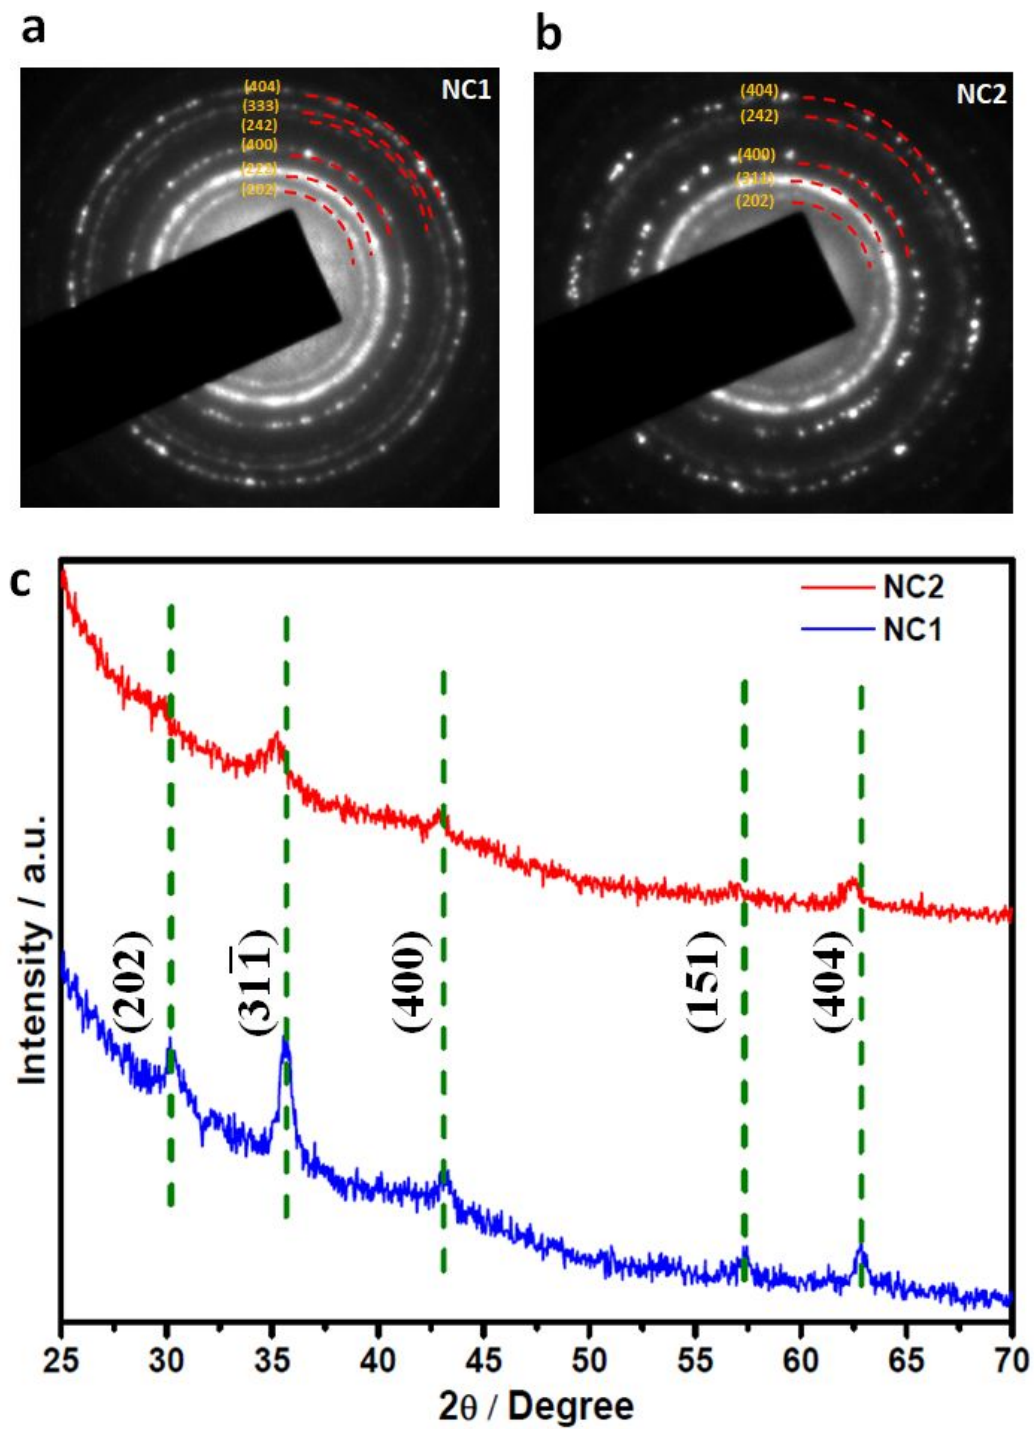

**Figure S1.** Crystal structure analysis. (a) SAED pattern of cubic MNPs from NC1 indicating the presence of the  $\text{Fe}_3\text{O}_4$  spinel phase. (b) SAED pattern of cubic MNPs from NC2 indicating the presence of  $\text{Fe}_3\text{O}_4$

spinel phase with poor crystallinity. (c) XRD analysis of cubic iron oxide MNPs from NC1 and NC2 highlighting the peak-shifts and differences in crystallinity.

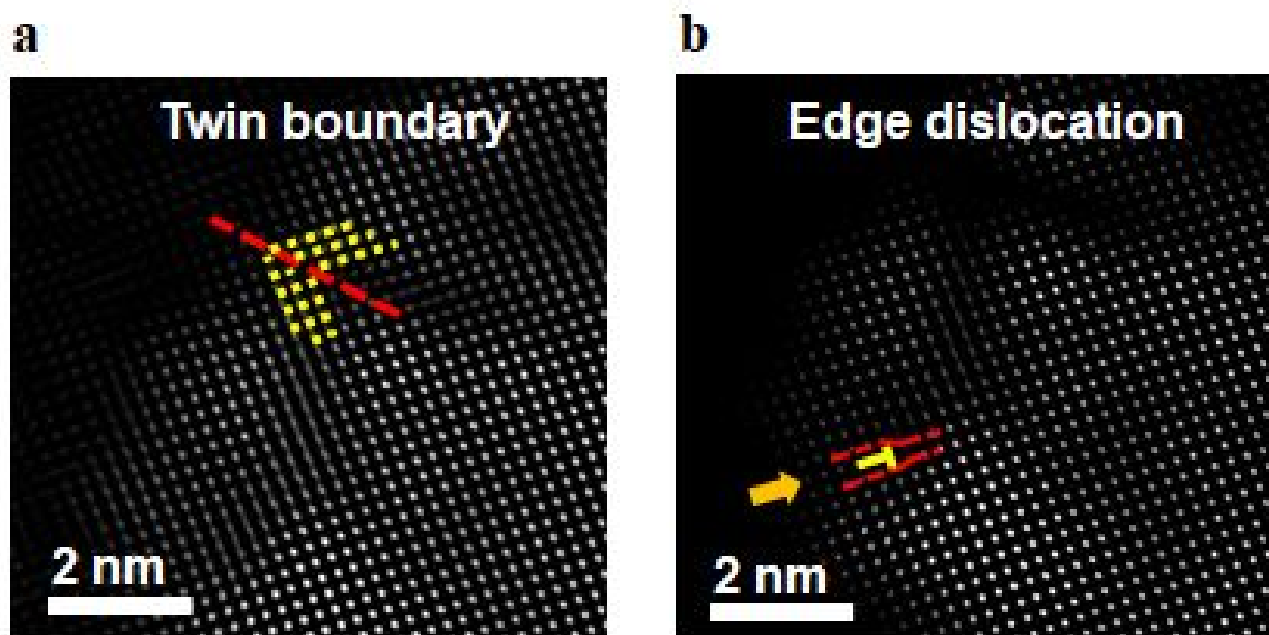

**Figure S2.** Additional high-resolution TEM analysis of cubic MNPs from NC2. (a) A twin boundary defect shown in IFFT acquired from a representative NC2 crystal. (b) An edge dislocation defect shown in IFFT acquired from the same representative NC2 crystal.
